# Supplementary material
Source: PubMed Central journal article supplement (PMC3043623)
Supplement: supp_00524.2010_legends.pdf [file supp_00524.2010_legends.pdf]

### Supplemental Figure Legends

Fig. S1. Hepatic mRNA levels for Sirt1, Irs1, and Irs2 were analyzed in control loxp, LKO<sup>Sirt1</sup>, and TKO<sup>Irs1/2:Sirt1</sup> mice (n=3) by real-time RT-PCR, respectively. Values are presented as means  $\pm$  SEM.

Fig. S2. Serum insulin levels were measured in 5-month old non-fasted male control loxp, LKO<sup>Sirt1</sup>, DKO<sup>Irs1/2</sup>, and TKO<sup>Irs1/2:Sirt1</sup> mice (n=5-8). Values are presented as means  $\pm$  SEM.
