# Supplementary material
Source: PubMed Central journal article supplement (PMC3043623)

Fig. S1

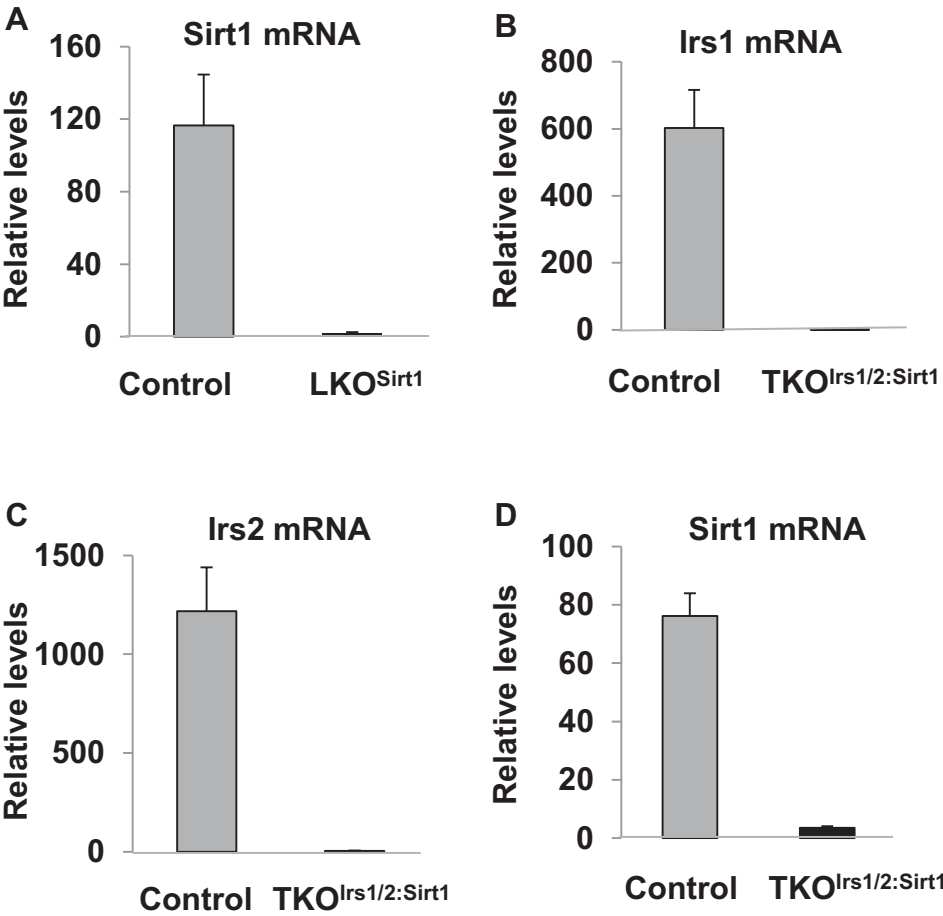

Fig. S2

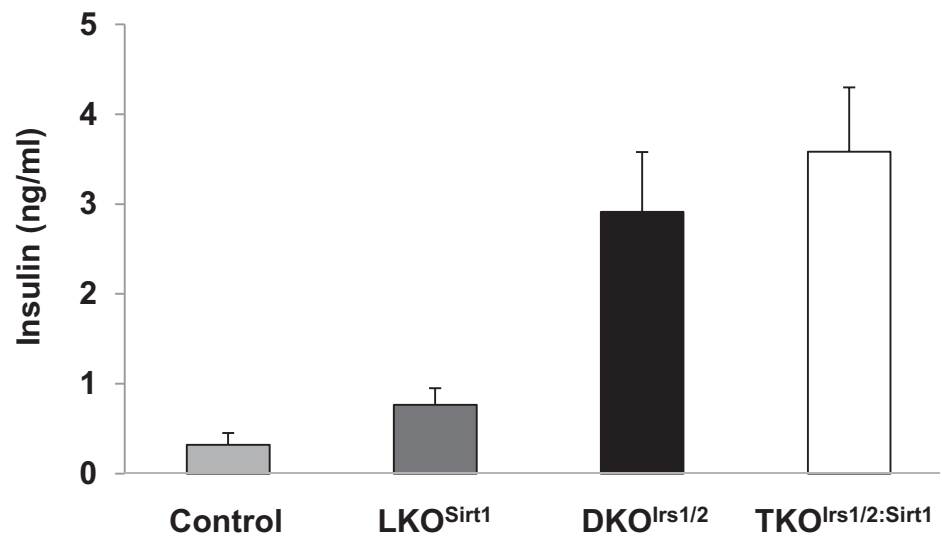

Supplement: supp_00524.2010_figs.pdf [file supp_00524.2010_figs.pdf]
